# Supplementary material
Source: PubMed Central journal article supplement (PMC5989679)
Supplement: CJN.11451017SupplementaryData.pdf [file CJN.11451017SupplementaryData.pdf]

**Supplemental Figure S1. Participant flow diagram**

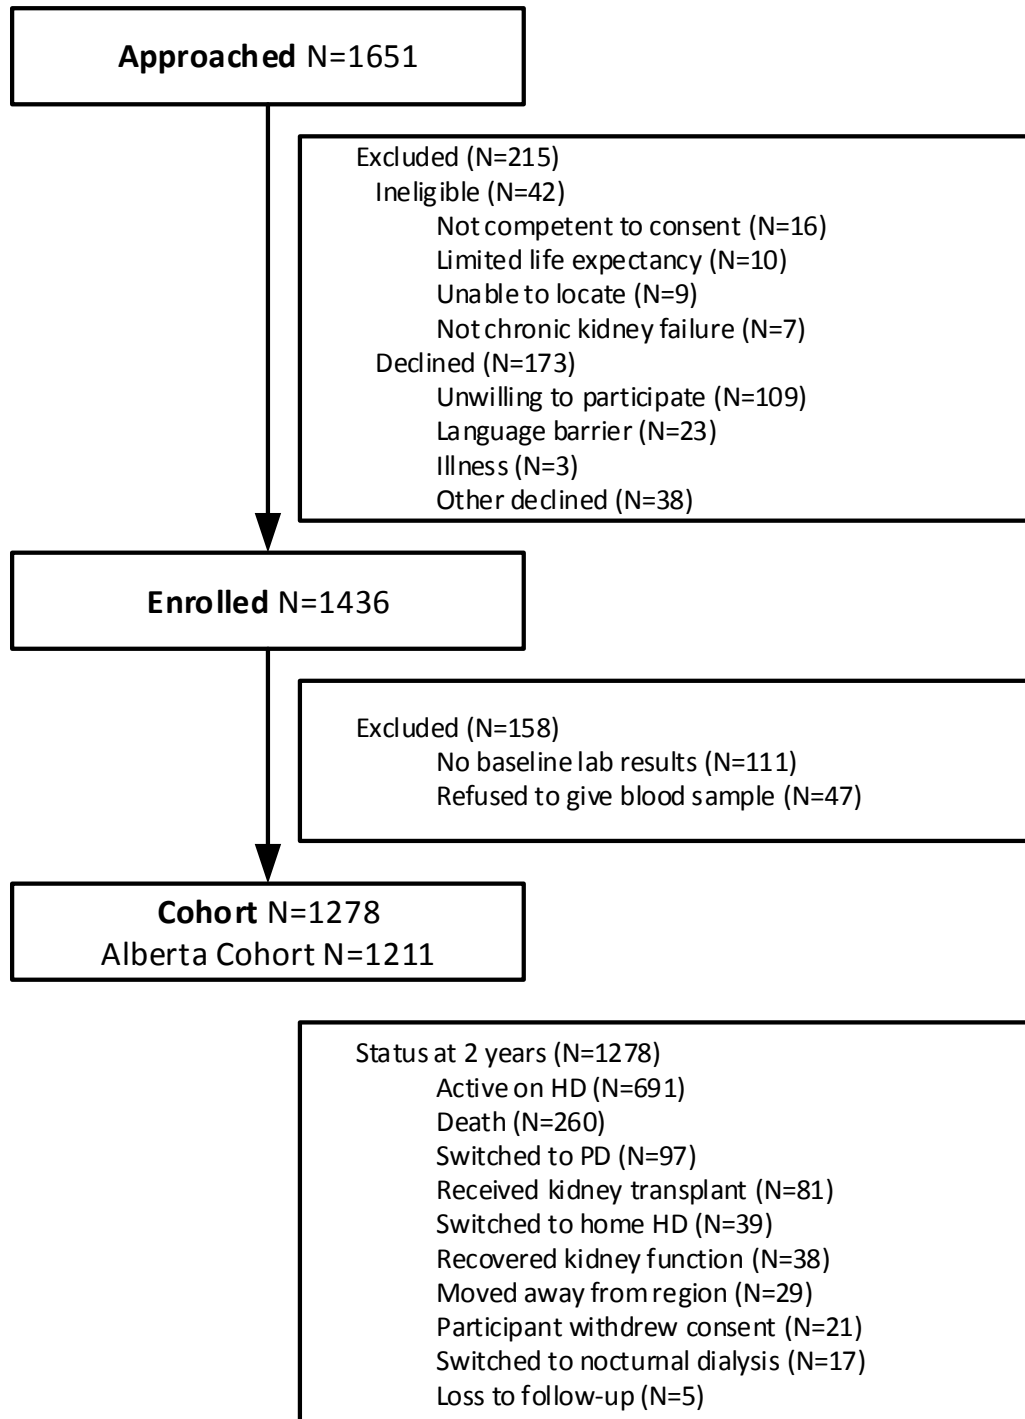

HD hemodialysis, PD peritoneal dialysis

Supplemental material is neither peer-reviewed nor thoroughly edited by CJASN. The authors alone are responsible for the accuracy and presentation of the material.

**Supplemental Table S1. ICD-9-CM and ICD-10-CA codes for clinical outcomes**

| <b>Variables</b>                   | <b>ICD-9-CM</b>                                                                                                                                                                                                                 | <b>ICD-10-CA</b>                                                                 |
|------------------------------------|---------------------------------------------------------------------------------------------------------------------------------------------------------------------------------------------------------------------------------|----------------------------------------------------------------------------------|
| Bacteremia and sepsis              | Most responsible discharge codes:<br>038.0, 038.10, 038.19, 038.2,<br>038.3, 038.41, 038.42, 038.43,<br>038.44, 038.49, 038.8, 038.9, 041.9                                                                                     | Most responsible discharge codes:<br>A40, A41, A49.9                             |
| Catheterization                    | Procedure codes: 37.21, 37.22,<br>37.23                                                                                                                                                                                         | CCI code: 3.IP.10                                                                |
| Coronary artery bypass grafting    | Procedure codes: 36.1, 36.2                                                                                                                                                                                                     | CCI code:1.IJ.76                                                                 |
| Percutaneous coronary intervention | Procedure codes: 36.01, 36.02,<br>36.05, 36.06                                                                                                                                                                                  | CCI codes: 1.IJ.50, 1.IJ.57.GQ,<br>1.IL.35                                       |
| Pneumonia                          | Most responsible discharge codes:<br>480.0, 480.1, 480.2, 480.8, 480.9,<br>481, 482.0, 482.1, 482.2, 482.9,<br>482.32, 482.39, 482.40, 482.82,<br>482.83, 482.89, 483.0, 483.1,<br>483.8, 484.7, 484.8, 485, 486,<br>487.0, 514 | Most responsible discharge codes:<br>J10.0, J12, J13, J14, J15, J16, J17,<br>J18 |

Supplemental material is neither peer-reviewed nor thoroughly edited by CJASN. The authors alone are responsible for the accuracy and presentation of the material.

**Supplemental Table S2. Trace element decile lower limits (µg/L) at baseline**

|                      | LDL <sup>1</sup> | 1      | 2     | 3     | 4     | 5     | 6     | 7     | 8     | 9     | 10                 |
|----------------------|------------------|--------|-------|-------|-------|-------|-------|-------|-------|-------|--------------------|
| Aluminum             | 10.0             | 0.3    | 4.1   | 5.1   | 5.9   | 6.9   | 7.9   | 9.3   | 11.0  | 13.8  | 21.4               |
| Antimony             | 0.25             | 0.01   | 0.30  | 0.55  | 0.82  | 1.03  | 1.22  | 1.45  | 1.74  | 2.12  | 2.76               |
| Arsenic              | 0.20             | 0.06   | 0.36  | 0.59  | 0.81  | 1.09  | 1.40  | 1.84  | 2.57  | 3.99  | 6.74               |
| Barium               | 0.50             | 0.31   | 1.14  | 1.51  | 1.80  | 2.08  | 2.45  | 2.97  | 3.71  | 4.61  | 5.78               |
| Beryllium            | 0.250            | <0.001 | 0.005 | 0.012 | 0.029 | 0.130 | -     | -     | -     | -     | 0.250 <sup>2</sup> |
| Cadmium              | 0.05             | <0.01  | 0.03  | 0.03  | 0.04  | 0.05  | 0.06  | 0.07  | 0.09  | 0.11  | 0.17               |
| Caesium              | 0.05             | 0.09   | 0.48  | 0.58  | 0.65  | 0.72  | 0.79  | 0.87  | 0.97  | 1.10  | 1.31               |
| Chromium             | 0.50             | 0.38   | 1.25  | 1.66  | 2.01  | 2.36  | 2.67  | 3.07  | 3.52  | 4.07  | 5.12               |
| Cobalt               | 0.05             | 0.27   | 0.39  | 0.44  | 0.49  | 0.54  | 0.59  | 0.65  | 0.74  | 0.88  | 1.16               |
| Copper               | 2.5              | 235    | 779   | 877   | 946   | 1,016 | 1,064 | 1,126 | 1,204 | 1,283 | 1,429              |
| Iron                 | 10               | 226    | 766   | 933   | 1,086 | 1,243 | 1,490 | 1,844 | 2,578 | 6,329 | 14,822             |
| Lead                 | 0.100            | 0.60   | 1.94  | 2.76  | 3.53  | 4.42  | 5.47  | 6.76  | 8.30  | 10.84 | 17.43              |
| Manganese            | 0.50             | 0.18   | 0.58  | 0.71  | 0.84  | 0.98  | 1.15  | 1.28  | 1.41  | 1.59  | 1.89               |
| Mercury              | 0.10             | 0.06   | 0.08  | 0.12  | 0.16  | 0.22  | 0.31  | 0.40  | 0.52  | 0.79  | 1.33               |
| Molybdenum           | 0.50             | 0.30   | 2.47  | 3.19  | 3.94  | 4.60  | 5.22  | 5.89  | 6.77  | 7.95  | 10.02              |
| Nickel               | 0.10             | 0.59   | 1.44  | 1.80  | 2.13  | 2.48  | 2.87  | 3.40  | 4.16  | 6.54  | 10.78              |
| Platinum             | 0.05             | <0.01  | <0.01 | <0.01 | <0.01 | <0.01 | 0.01  | 0.01  | 0.03  | -     | 0.05 <sup>3</sup>  |
| Selenium             | 2.5              | 33     | 94    | 105   | 111   | 117   | 123   | 128   | 134   | 142   | 156                |
| Silver               | 0.10             | 0.01   | 0.05  | 0.07  | 0.10  | 0.13  | 0.16  | 0.21  | 0.30  | 0.48  | 0.90               |
| Strontium            | 1                | 15     | 35    | 39    | 42    | 44    | 47    | 50    | 54    | 58    | 67                 |
| Thallium             | 0.050            | 0.001  | 0.015 | 0.018 | 0.021 | 0.023 | 0.025 | 0.028 | 0.032 | 0.036 | 0.042              |
| Tungsten             | 0.1              | 0.002  | 0.013 | 0.020 | 0.027 | 0.034 | 0.041 | 0.050 | 0.059 | 0.077 | 0.113              |
| Uranium <sup>4</sup> | 0.050            | <0.001 | 0.002 | 0.004 | 0.005 | 0.006 | 0.007 | 0.008 | 0.010 | 0.012 | 0.026              |
| Vanadium             | 1.00             | 0.01   | 0.04  | 0.07  | 0.10  | 0.16  | 0.27  | 0.49  | 0.70  | 1.05  | 1.95               |
| Zinc                 | 2.5              | 212    | 619   | 701   | 773   | 841   | 910   | 975   | 1070  | 1177  | 1335               |

LDL lower detection limit

<sup>1</sup>Values below the laboratory's lower detection limit are less accurate.

<sup>2</sup>59% of the beryllium values are 0.25. These have been placed in the 10th decile bin. The 5<sup>th</sup> decile bin for beryllium contains <10% (1%) of the total values and excludes the value 0.25.

<sup>3</sup>21% of the platinum values are 0.05. These have been placed in the 10th decile bin. The 8<sup>th</sup> decile bin for platinum contains <10% (9%) of the total values and excludes the value 0.05.

<sup>4</sup>1 value was missing for uranium. We imputed it using its median value of 0.007.

Supplemental material is neither peer-reviewed nor thoroughly edited by CJASN. The authors alone are responsible for the accuracy and presentation of the material.

**Supplemental Table S3. Unadjusted probabilities of clinical outcomes after 2 years by decile of trace element concentration**

|                             | Deciles |      |      |      |      |      |      |      |      |      | P-value |
|-----------------------------|---------|------|------|------|------|------|------|------|------|------|---------|
|                             | 1       | 2    | 3    | 4    | 5    | 6    | 7    | 8    | 9    | 10   |         |
| <b>Death</b>                |         |      |      |      |      |      |      |      |      |      |         |
| Selenium                    | 0.32    | 0.29 | 0.26 | 0.23 | 0.20 | 0.18 | 0.16 | 0.14 | 0.13 | 0.11 | 0.002   |
| Molybdenum                  | 0.25    | 0.24 | 0.23 | 0.22 | 0.21 | 0.20 | 0.19 | 0.18 | 0.17 | 0.16 | 0.008   |
| Arsenic                     | 0.27    | 0.25 | 0.23 | 0.22 | 0.21 | 0.19 | 0.18 | 0.17 | 0.16 | 0.14 | 0.009   |
| Iron                        | 0.26    | 0.25 | 0.23 | 0.22 | 0.21 | 0.19 | 0.18 | 0.17 | 0.16 | 0.15 | 0.01    |
| Mercury                     | 0.26    | 0.25 | 0.23 | 0.22 | 0.21 | 0.19 | 0.18 | 0.17 | 0.16 | 0.15 | 0.02    |
| Cadmium                     | 0.16    | 0.16 | 0.17 | 0.18 | 0.19 | 0.20 | 0.22 | 0.23 | 0.24 | 0.25 | 0.03    |
| Strontium                   | 0.25    | 0.24 | 0.23 | 0.22 | 0.20 | 0.19 | 0.18 | 0.17 | 0.16 | 0.15 | 0.04    |
| Caesium                     | 0.26    | 0.24 | 0.23 | 0.22 | 0.20 | 0.19 | 0.18 | 0.17 | 0.16 | 0.15 | 0.04    |
| Thallium                    | 0.25    | 0.24 | 0.23 | 0.22 | 0.20 | 0.19 | 0.19 | 0.18 | 0.17 | 0.16 | 0.05    |
| Copper                      | 0.14    | 0.15 | 0.16 | 0.17 | 0.19 | 0.20 | 0.22 | 0.23 | 0.25 | 0.27 | 0.05    |
| <b>Cardiovascular event</b> |         |      |      |      |      |      |      |      |      |      |         |
| Zinc                        | 0.20    | 0.21 | 0.21 | 0.22 | 0.23 | 0.24 | 0.25 | 0.26 | 0.27 | 0.28 | 0.006   |
| Selenium                    | 0.28    | 0.27 | 0.26 | 0.25 | 0.24 | 0.23 | 0.22 | 0.21 | 0.20 | 0.19 | 0.05    |
| <b>Infection event</b>      |         |      |      |      |      |      |      |      |      |      |         |
| Caesium                     | 0.13    | 0.12 | 0.11 | 0.11 | 0.10 | 0.09 | 0.08 | 0.08 | 0.07 | 0.06 | 0.006   |
| Antimony                    | 0.07    | 0.07 | 0.08 | 0.09 | 0.09 | 0.10 | 0.10 | 0.11 | 0.12 | 0.12 | 0.03    |
| Arsenic                     | 0.12    | 0.12 | 0.11 | 0.10 | 0.10 | 0.09 | 0.08 | 0.08 | 0.07 | 0.07 | 0.05    |
| <b>Hospitalization</b>      |         |      |      |      |      |      |      |      |      |      |         |
| Caesium                     | 0.81    | 0.80 | 0.79 | 0.78 | 0.77 | 0.76 | 0.75 | 0.74 | 0.73 | 0.72 | 0.02    |
| Selenium                    | 0.85    | 0.84 | 0.82 | 0.80 | 0.79 | 0.77 | 0.74 | 0.72 | 0.70 | 0.67 | 0.02    |
| Mercury                     | 0.80    | 0.80 | 0.79 | 0.78 | 0.77 | 0.76 | 0.75 | 0.75 | 0.74 | 0.73 | 0.02    |
| Vanadium                    | 0.72    | 0.73 | 0.74 | 0.75 | 0.76 | 0.77 | 0.78 | 0.79 | 0.80 | 0.81 | 0.03    |
| Manganese                   | 0.74    | 0.74 | 0.75 | 0.76 | 0.76 | 0.77 | 0.78 | 0.78 | 0.79 | 0.80 | 0.05    |

Using logistic regression, only trace elements with significant linear at  $P < 0.05$  with clinical outcomes are shown. They are ordered by strength of significance. The trace elements in blue font indicate that more is associated with a negative outcome.

Supplemental material is neither peer-reviewed nor thoroughly edited by CJASN. The authors alone are responsible for the accuracy and presentation of the material.

**Supplemental Table S4. Adjusted odds ratios of clinical outcomes after 2 years (and 95% CI)**

| Trace elements                                                                                                                                       | Death            | Cardiovascular events | Infection events | Hospitalizations |
|------------------------------------------------------------------------------------------------------------------------------------------------------|------------------|-----------------------|------------------|------------------|
| Participants <sup>1</sup>                                                                                                                            | 1,278            | 1,211                 | 1,211            | 1,211            |
| Events                                                                                                                                               | 260              | 285                   | 117              | 928              |
| <i>Model 1 – using all deciles as a linear term</i>                                                                                                  |                  |                       |                  |                  |
| Per decile                                                                                                                                           |                  |                       |                  |                  |
| Arsenic                                                                                                                                              | 0.94 (0.89,0.99) |                       | 1.08 (1.02,1.14) |                  |
| Beryllium                                                                                                                                            |                  |                       |                  |                  |
| Caesium                                                                                                                                              | 0.93 (0.89,0.99) |                       |                  |                  |
| Copper                                                                                                                                               | 1.07 (1.02,1.13) |                       |                  |                  |
| Selenium                                                                                                                                             | 0.88 (0.83,0.93) |                       |                  | 0.93 (0.88,0.97) |
| Vanadium                                                                                                                                             |                  |                       |                  | 1.06 (1.01,1.11) |
| <i>Model 2 – using the lowest and highest deciles vs deciles 2-9</i>                                                                                 |                  |                       |                  |                  |
| Lowest decile                                                                                                                                        |                  |                       |                  |                  |
| Selenium                                                                                                                                             | 3.19 (2.09,4.88) |                       |                  | 3.52 (1.79,6.92) |
| Highest decile                                                                                                                                       |                  |                       |                  |                  |
| Barium                                                                                                                                               |                  |                       | 2.71 (1.53,4.82) |                  |
| Beryllium                                                                                                                                            |                  |                       | 2.22 (1.34,3.67) |                  |
| Cadmium                                                                                                                                              | 1.67 (1.08,2.58) |                       |                  | 1.94 (1.07,3.52) |
| Nickel                                                                                                                                               |                  |                       |                  | 0.52 (0.33,0.81) |
| <i>Model 3 – using the 5<sup>th</sup> and 95<sup>th</sup> referent percentiles vs participants in the 6<sup>th</sup>-94<sup>th</sup> percentiles</i> |                  |                       |                  |                  |
| <5 <sup>th</sup> referent percentile                                                                                                                 |                  |                       |                  |                  |
| Selenium                                                                                                                                             | 3.42 (1.17,9.96) |                       |                  |                  |
| >95 <sup>th</sup> referent percentile                                                                                                                |                  |                       |                  |                  |
| Copper                                                                                                                                               | 3.65 (1.71,7.82) |                       |                  |                  |
| Selenium                                                                                                                                             | 0.49 (0.36,0.67) |                       |                  | 0.62 (0.44,0.88) |
| Silver                                                                                                                                               |                  |                       |                  | 1.92 (1.12,3.27) |
| Vanadium                                                                                                                                             |                  |                       |                  | 1.57 (1.15,2.15) |

CI confidence interval

<sup>1</sup>Only Albertan participants were included in the modeling of cardiovascular events, infection events, and hospitalizations

All three models use the forward stepwise procedure using all variables from Table 1 and Supplemental Table S3 as candidate variables. Missing values were imputed with the most frequent categorical or median continuous value. Albumin was not a candidate variable for cardiovascular events, infection events, and hospitalizations because it was only available in Albertan participants. This table shows results from 12 models (3 for each approach to modeling the trace elements X 4 for each type of outcome). Only the retained (due to significance at P<0.05) trace element variables are shown. Retained demographic and clinical characteristic variables are not shown.
